1

2

3

4

5

**ICOS enhances follicular T helper responses and deteriorates the pathogenic process of liver in mice infected with *Schistosoma japonicum***

6

7 Bo Wang<sup>1,2</sup>, Song Liang<sup>2</sup>, Yan-Yan Wang<sup>2</sup>, Yu Wang<sup>2</sup>, Chao-Ming Xia<sup>2\*</sup>

8

1 Laboratory Department, Inner Mongolia People's Hospital, Huhhot, Inner Mongolia Autonomous

9

Region, The Peoples Republic of China, 010017

10

2 Department of Parasitology, Medical College of Soochow University, Suzhou, Jiangsu Province, The

11

Peoples Republic of China, 215123

12

13 \* Corresponding author: Professor Chao-Ming Xia, Department of Parasitology, Medical

14 College of Soochow University, Renai Road, Industrial Park, Suzhou 215123, Jiangsu

15 Province, P. R. China.

16 E-mail: [cmx2019@126.com](mailto:cmx2019@126.com)

17 **Funding:** This work was supported by grants from the National Natural Science Foundation

18 of China (No: 81171603 and No: 81471977) to C.M.X and the General Program of Inner

19 Mongolia Natural Science Foundation of China (No:2016BS0812), A project funded by the

20 Program of Inner Mongolia People's Hospital Foundation (No:2019YN23) to B.W. The

21 funders had no role in study design, data collection and analysis, decision to publish, or

22 preparation of the manuscript.

23 **Abstract**

24 **Background:** Humoral immune responses play an important role in mediating liver  
25 granulomatous inflammation and fibrosis in schistosomiasis. Follicular helper T (Tfh) cells  
26 have a central role in mediating humoral immune responses. Generation of Tfh cells depends  
27 on inducible T cell costimulator (ICOS) signaling, but the underlying molecular mechanisms  
28 are incompletely understood in pathogenesis of schistosomiasis.

29 **Methodology/Principal Findings:** We used a strain of ICOS-transgenic (Tg) mice to  
30 test the degrees of liver granulomatous inflammation and fibrosis, the frequency of splenic  
31 Tfh cells and soluble egg antigen-specific cytokine responses longitudinally in mice  
32 following *Schistosoma japonicum* (*S. japonicum*) infection. In comparison with that in  
33 wide-type (WT) mice, significantly severer liver granulomatous inflammation and fibrosis  
34 and higher mortality were observed in ICOS-Tg mice. Significantly higher frequency of  
35 splenic Tfh cells was accompanied by significantly higher levels of Bcl-6 and CXCR5  
36 expression in the livers of ICOS-Tg mice. Furthermore, significantly higher levels of  
37 SEA-specific IL-4, IL-6, IL-10, IL-13, IL-17A, IL-21 and TGF- $\beta$ 1 responses, but lower  
38 levels of IFN- $\gamma$  responses were detected in ICOS-Tg mice, which were abrogated by  
39 treatment with ICOS blockers in vitro. In addition, significantly higher levels of serum  
40 anti-SEA IgG were detected in ICOS-Tg mice.

41 **Conclusions/Significance:** The ICOS-related signaling may promote the pathogenesis  
42 of murine schistosomiasis by polarizing Tfh cells, which may be immune check points for the  
43 prevention and intervention of schistosomiasis.

44 **Author summary**

45           Granulomatous inflammation and fibrosis in the liver are the major pathogenic  
46 characteristics of schistosomiasis. ICOS is crucial for the development of Tfh cells, which are  
47 the key modulators of B cell activation and humoral immunity. However, the underlying  
48 molecular mechanisms are incompletely understood in pathogenesis of schistosomiasis. Here,  
49 our results showed that the ICOS over-expression would significantly induce severer liver  
50 inflammation and fibrosis, higher frequency of splenic Tfh, higher levels of anti-SEA IgG as  
51 well as imbalanced SEA-specific cytokine responses in ICOS-Tg mice. The findings  
52 suggested that ICOS signaling may promote the pathogenesis of murine schistosoma-related  
53 liver inflammation and fibrosis by polarizing Tfh cells. Potentially, ICOS signaling and Tfh  
54 cells may be immune check points for the prevention and intervention of schistosomiasis.

55

## 56 **Introduction**

57 *S. japonicum* infection remains a problem for human health in developing countries.  
58 During the pathogenesis of schistosomiasis, *S. japonicum* infection-related egg deposition can  
59 recruit inflammatory infiltrates and cause granulomatous inflammation and fibrosis in the  
60 liver [1,2]. More importantly, continual pathogenic process of inflammation and fibrosis in  
61 the liver usually impairs its function, even leading to cirrhosis and live failure. Although  
62 previous studies have shown that antigen-specific T cells, such as Th2 and Th17, participate  
63 in the pathogenic process and Th1 and regulatory T cells (Tregs) antagonize *Schistosomiasis*-  
64 related inflammation [3-5]. The molecular mechanisms of immunoregulation of *S. japonicum*  
65 infection-related inflammation and fibrosis in the liver have been incompletely clarified.  
66 Hence, illustration of the pathogenic process of *S. japonicum* infection-related inflammation  
67 and fibrosis will be of great significance in the develop targets for design of new therapies for  
68 patients with schistosomiasis.

69 Tfh cells are activated CD4<sup>+</sup> T cells commonly resident in the B cell follicles of second  
70 lymph tissues and constitutively express homing receptor CXCR5 [6,7]. Tfh cells can also  
71 express programmed death 1 (PD-1), ICOS and CD40L and secrete IL-21 as well as other  
72 cytokines, which are crucial for their autocrine regulation of Tfh development and functions  
73 [8-10]. Tfh differentiation is mainly regulated by the transcription factor, Bcl-6 [11].Tfh cells  
74 can promote antigen-specific B cell activation, germinal center formation and humoral  
75 responses [12,13]. In addition, Tfh cells are involved in the pathogenic process of some  
76 autoimmune diseases [14-16] and participate in defending against parasite infection [17,18].  
77 Indeed, increased frequency of Tfh cells is detected in rodent with *S. japonicum* infection and

78 Tfh cells activated by ICOS<sup>+</sup> macrophages infiltrate into the liver and enhance the liver injury  
79 in mice infected with *S. japonicum* [19].

80 ICOS is crucial for T and B cell activation and important for T and B cell interaction to  
81 promote humoral responses [20]. ICOS is highly expressed by human tonsillar CXCR5<sup>+</sup> T  
82 cells within the light zone of germinal centers and efficiently support immunoglobulin  
83 production [21,22]. In addition, ICOS-deficient mice show poor humoral responses and ICOS  
84 deficiency in humans results in significantly reduced numbers of Tfh cells, indicating a  
85 critical role of ICOS in the differentiation of CXCR5<sup>+</sup> CD4<sup>+</sup> T cells [23,24]. However, it is  
86 incompletely understood that the underlying molecular mechanisms of Tfh development and  
87 function in pathogenesis of schistosomiasis. Here we characterized to establish the ICOS-Tg  
88 mice as a model of schistosomiasis to assess the role of the ICOSL/ICOS interaction in  
89 mediating humoral immune responses by polarizing Tfh cells, particularly, which were  
90 abrogated by treatment with ICOS blockers in vitro. ICOS signaling and Tfh cells may be  
91 immune check points for the prevention and intervention of schistosomiasis.

92

## 93 **Methods**

### 94 **Ethics statement**

95 The experimental protocols were established, according to the Regulations for the  
96 Administration of Affairs Concerning Experimental Animals (1988.11.1) of the State Science  
97 and Technology Commission of the People's Republic China and were approved by the  
98 Institutional Animal Care and Use Committee (IACUC) of Soochow University (Permit  
99 Number: 2007-13). All efforts were made to minimize suffering of animals.

100

101 **Mice, parasites, and infection**

102       Specific pathogen-free (SPF) female FVB mice (6-8 weeks old) were purchased from  
103 the Center of Comparative Medicine of Yangzhou University (Yangzhou, China). Animals  
104 were housed and bred in a SPF facility of our campus. To generate ICOS-Tg mice, human  
105 ICOS cDNA was amplified by RT-PCR from activated human T cells and cloned into a  
106 vector pEGFP-N2 plasmid, and a Tg cassette that drives transgene expression by the CMV  
107 promoter/enhancer. The *AseI-StuI* transgene fragment at 0.642 kb was microinjected into  
108 fertilized mouse eggs prepared from FVB mice.

109       The generated ICOS-Tg founders were backcrossed to FVB mice over 10 generations to  
110 stabilize the Tg strain (Yangzhou, China). Snails (*Oncomelania hupensis*) harboring *S.*  
111 *japonicum* cercariae (Chinese mainland strain) were purchased from Jiangsu Institute for  
112 Schistosomiasis Control (Wuxi, China).

113       Individual FVB wide-type and ICOS-Tg mice at 6-8 weeks of age were infected with  
114 14 ( $\pm$ 1) cercaria of *S. japonicum* through the abdominal skin. At 4, 7, 12, 16, and 20 weeks  
115 post-infection, 8 mice at each time point from the infected and control groups were randomly  
116 chosen and sacrificed for subsequent *ex vivo* experiments. The remaining 20 mice per group  
117 were monitored for their survival until they met certain clinical criteria for sacrifice. The  
118 criteria included severe diarrhea, and difficult to eat and breath.

119

120 **Flow cytometry**

121       The frequency of T<sub>fh</sub> and other subsets of T cells was determined by flow cytometry

122 analysis. Briefly, splenic mononuclear cells were prepared from individual mice at each time  
123 point post infection and the cells at  $1 \times 10^6$ /tube were stained in duplicate with FITC-anti-CD4,  
124 PE-anti-CXCR5, PE-Cy5-anti-ICOS, and APC-anti-CD40L or isotype controls (eBioscience,  
125 San Diego, USA). The percentages of CXCR5<sup>+</sup>CD4<sup>+</sup> Tfh cells, ICOS<sup>+</sup>CXCR5<sup>+</sup>CD4<sup>+</sup> Tfh  
126 cells and CD40L<sup>+</sup>CXCR5<sup>+</sup>CD4<sup>+</sup> Tfh cells were analyzed on a FACS Calibur Flow Cytometer  
127 (BD Biosciences).

128 In addition, splenic mononuclear cells at  $1 \times 10^6$  cells/well were stimulated with 25  
129 ng/ml of phorbolmyristate acetate (PMA) and 1  $\mu$ g/ml of ionomycin (Sigma-Aldrich) in  
130 complete RPMI 1640 medium in the presence of 3  $\mu$ g/ml of BFA for 5 hours at 37 °C in 5%  
131 CO<sub>2</sub>. Subsequently, the cells were surface-stained with FITC-anti-CD4 and PE-anti-CXCR5  
132 or FITC-anti-CD4 alone, fixed, permeabilized with Fixation/Permeabilization buffer,  
133 followed by intracellularly staining with APC-anti-IL-21, PE-anti-BCL-6 or isotype controls  
134 for analyzing the frequency of IL-21<sup>+</sup>CXCR5<sup>+</sup>CD4<sup>+</sup> or BCL-6<sup>+</sup>CD4<sup>+</sup> Tfh cells, respectively.

135

### 136 **Culture and stimulation of splenic mononuclear cells *in vitro***

137 Splenic mononuclear cells were prepared from individual mice in each group at the  
138 indicated time points post infection. Splenic mononuclear cells at  $1 \times 10^6$  cells/well were  
139 stimulated in triplicate with 25  $\mu$ g/ml of soluble egg antigens (SEA) of *S. japonicum* from  
140 Jiangsu Institute for Schistosomiasis Control (Wuxi, China), 25 ng/ml of PMA and 1  $\mu$ g/ml of  
141 ionomycin in 10% fetal bovine serum (FBS) RPMI 1640 in 24-well plates at 37 °C for 72  
142 hours in the presence or absence of 0.5  $\mu$ g/ml of anti-ICOSL or 0.375  $\mu$ g/ml of antagonist  
143 anti-ICOS (eBioscience). The culture supernatants were collected and the contents of

144 cytokines (IL-2, IL-4, IL-6, IL-10, IL-13, IL-17A, IL-21, IFN- $\gamma$ , TNF- $\alpha$ ) were determined by  
145 Cytometric Bead Array (CBA) using specific kit (BD Biosciences, San Diego, USA),  
146 according to the manufacturers' instruction. The levels of TGF- $\beta$ 1 in the cultured supernatants  
147 were measured by ELISA using the ELISA Ready-SET-Go kit (eBioscience, San Diego, CA),  
148 according to the manufacturers' protocol. The limitation of detection for IL-2, IL-4, IL-6,  
149 IL-10, IL-13, IL-17A, IL-21, IFN- $\gamma$ , TNF- $\alpha$  and TGF- $\beta$ 1 is (2.8pg/ml) respectively.

150

### 151 **Enzyme-linked immunosorbent assay (ELISA)**

152 The concentrations of serum SEA-specific IgG and HA in individual mice were  
153 evaluated by ELISA. Briefly, individual wells of 96-well ELISA plates (ICN Biomedicals,  
154 Costa Mesa, USA) were coated with 100  $\mu$ l of SEA (20  $\mu$ g/ml) in 0.05 M carbonate buffer  
155 (pH 9.6) overnight at 4°C and after being washed and blocked with 10% FCS in 0.01M PBST,  
156 the wells were added in triplicate with 1:100 diluted serum samples and cultured at 37 °C for  
157 1 hour. The bound antibodies were detected with horseradish peroxidase (HRP)-conjugated  
158 goat anti-mouse IgG (1:4000) for 1 hour at 37 °C and developed with tetramethyubenzidine  
159 (TMB) substrate (BD PharMigen), followed by measuring the absorbance of individual wells  
160 at 450 nm using an ELISA reader (Bio-rad mod.550). Serum samples from unmanipulated  
161 mice were used for negative controls.

162

### 163 **Histopathological study**

164 The liver tissue samples from individual mice were dissected out at the indicated time  
165 points post infection, fixed with paraformaldehyde and paraffin-embedded. The tissue



166 sections at 5  $\mu\text{m}$  were stained with hematoxylin-eosin and the egg-related granuloma volumes  
167 of individual liver samples were evaluated using a formula of  $V=\pi AB^2/6$ , where A and B  
168 represented two diameters cross opposite axes [5].

169 Furthermore, some liver tissue sections were stained with Masson trichrome (MT). The  
170 degrees of liver fibrosis in at least 10 low-power fields (magnification x 100) of each sample  
171 were evaluated by pathologists in a blinded manner. In addition, the percentages of collagen+  
172 regions were calculated using an image analysis system (Image-Pro Plus 6.0) to measure a  
173 relative objective index. The fibrotic areas were calculated and expressed as the relative ratios  
174 of the collagen-containing area to the whole area. At least 10 high-power fields  
175 (magnification x 200) were measured from each liver sample.

176

### 177 **Immunohistochemistry**

178 The contents of CXCR5 and Bcl-6 expression in the livers of individual mice were  
179 evaluated by immunohistochemistry. Briefly, liver tissue sections (5  $\mu\text{m}$ ) were rehydrated,  
180 and treated with 3%  $\text{H}_2\text{O}_2$ , followed by blocking with 10% normal goat serum (Boster,  
181 Wuhan, China). Subsequently, the sections were incubated with rabbit anti-CXCR5 (1:500,  
182 Millipore, Germany) or rabbit anti-Bcl-6 (1:100, Santa Cruz, USA) overnight at 4 °C and  
183 bound antibodies were detected using HRP-conjugated goat anti-rabbit IgG (ChemMate  
184 Envision/HRP, rabbit/mouse detection kit, Gene-tech, Shanghai, China) at 37 °C for 1 hour.  
185 After being washed, the immune staining was visualized using 3, 3'-Diaminobenzidine (DAB)  
186 and counterstained with Mayer's hematoxylin. Rabbit sera at 1:10 dilutions served as  
187 negative controls. The intensity and percentages of positive staining cells in the liver

188 granulomas were evaluated for five high-power fields selected randomly using the Leica  
189 QWin Plus software, version 3.5.1 (Leica Microsystems, Switzerland). The percentage of  
190 positively staining cells in 15 granulomas was assessed and the mean of % positively staining  
191 cells in 15 granulomas +/- SD in each group was calculated.

192

### 193 **Statistical analysis**

194 Statistical analysis was performed using the SPSS version 10.1 (Statistical Package for  
195 Social Science, Chicago, IL) software. The difference of the data among the groups was  
196 compared by two-way ANOVA followed by Tukey's multiple comparison test. The  
197 relationship between measures was analyzed by Spearman's rank correlation. The survival of  
198 each group of mice was estimated by Kaplan-Meier survival analysis and the difference  
199 between two groups was analyzed by the log-rank test. A P value of  $P < 0.05$  were considered  
200 statistically significant.

201

## 202 **Results**

### 203 **ICOS over-expression deteriorates the liver granulomatous inflammation and fibrosis in** 204 **mice post-infection**

205 *S. japonicum* infection can cause liver granulomatous inflammation and fibrosis. To  
206 assess the impact of ICOS over-expression on *S. japonicum* infection-related liver  
207 inflammation the liver and spleen gross pathology, weights and liver granulomatous  
208 inflammation were examined longitudinally in WT and ICOS-Tg mice following *S.*  
209 *japonicum* infection. We observed dark-yellow livers (Fig 1A-b,c) compared with

210 non-infected liver (Fig 1A-a) and enlarged spleens in the mice infected with *S. japonicum*  
211 (Fig 1A-d). The liver and spleen weights in the mice infected with *S. japonicum* rapid  
212 increased and significantly greater than that in the non-infected mice (Fig 1B). The liver and  
213 spleen weights in ICOS-Tg mice were significantly greater than that in the WT mice at 4  
214 weeks post infection and later time points (Fig 1B; \* $P < 0.05$  or \*\* $P < 0.01$ ). Histological  
215 examination indicated that the mean volumes of granulomas in the ICOS-Tg mice were also  
216 significantly bigger than that in the WT mice (Fig 1C and D). More importantly, the overall  
217 survival periods of ICOS-Tg mice were significantly shorter than that in the WT mice (Fig 1E;  
218  $P < 0.01$ ). Collectively, these data indicated that induction of systemic ICOS over-expression  
219 deteriorated the liver granulomatous inflammation and fibrosis and accelerated mortality in  
220 mice infected with *S. japonicum*.

221         Given that chronic *S. japonicum* infection is associated with the liver fibrosis we  
222 examined the effects of systemic ICOS over-expression on the liver fibrosis in mice infected  
223 with *S. japonicum*. MT staining revealed that the liver fibrosis developed at 7 weeks post  
224 infection and the degrees of liver fibrosis increased with time in mice following *S. japonicum*  
225 infection (Fig 2A). Quantitative analysis pointed out that the degrees of liver fibrosis in the  
226 ICOS-Tg mice were significantly greater than that in the WT mice (Fig 2B;  $P < 0.01$ ).  
227 Therefore, induction of systemic ICOS over-expression enhanced the fibrotic process in the  
228 livers of mice following *S. japonicum* infection.

229

230 **Fig 1. Hepatic granulomatous inflammation and fibrosis in ICOS-Tg mice post-infection.**

231 Female FVB ICOS-Tg and WT mice were infected with *S. japonicum*. The liver and spleen

232 gross pathology, weights and liver granulomatous inflammation in WT and ICOS-Tg mice  
233 were examined longitudinally at the indicated time points post *S. japonicum* infection. The  
234 liver tissue sections were stained with H&E and granulomatous inflammatory areas were  
235 analyzed in a blinded manner. Data are representative images and expressed as the mean  $\pm$   
236 SEM of each group (n=8 per group per time point). The survival of remaining mice (n=20 per  
237 group) were monitored. **(A)** The gross pathology of the livers from the healthy control **(a)**;  
238 infected WT mice **(b)** and ICOS-Tg mice **(c)** and spleens **(d)**: from left to right: normal spleen;  
239 infected WT mice; infected ICOS-Tg mice). **(B)** The changes in the liver and spleen weights.  
240 The liver and spleen weights of healthy mice at 4 weeks post infection was designated as  
241 100%. Two-way ANOVA followed by Tukey's multiple comparison test showed no  
242 significant genotype  $\times$  time interaction effect for the liver/spleen weight changes ( $P=0.455$ /  
243  $P=0.16$ ). The main effects showed a significant difference in the changes of the liver/spleen  
244 weights among different time points and different genotypes (\*\* $P<0.01$ ). **(C)** H&E analysis  
245 of the liver sections of mice at 12 weeks post infection. The images are original magnification,  
246  $\times 100$ ; scale bar, 100 $\mu$ m. Arrowheads indicate the margins of hepatic granulomatous  
247 inflammation. **(D)** The mean granuloma sizes in ICOS-Tg and WT mice were assessed at 7,  
248 12, or 16 weeks post-infection and quantified from at least 20 granulomas selected randomly  
249 from individual mice, as described in the Materials and Methods. \* $P<0.05$ , \*\* $P<0.01$ , or  
250 \*\*\* $P<0.001$  vs. the WT mice. Two-way ANOVA and then Tukey's multiple comparison tests  
251 showed a significant genotype  $\times$  time interaction effect for the volumes of egg granuloma  
252 (\* $P<0.05$ ). The main effects showed a significant difference in the volumes of egg granuloma  
253 among different time points and different genotypes (\* $P<0.05$  or \*\* $P<0.01$ ). **(E)** The survival

254 of mice following *S. japonicum* infection. (ICOS-Tg vs. WT,  $P=0.0038$ ). The survival  
255 analysis data are a representative of three independent experiments with similar results.

256

257 **Fig 2. The schistosoma-related liver fibrosis in ICOS-Tg mice.** The liver tissue sections  
258 from individual mice at the indicated time points post infection were stained with MT  
259 (original magnification $\times 200$ ). (A) The blue area represents fibrillar collagen. (B) Two-way  
260 ANOVA and Tukey's multiple comparison tests showed a significant genotype  $\times$  time  
261 interaction effect for the ratios of fibrotic to total area (%) (\*\* $P=0.0035$ ). The main effects  
262 showed a significant difference in the ratios of fibrotic to total area (%) among different time  
263 points and different genotypes (\*\* $P<0.01$ ).

264

265 **ICOS over-expression increases the frequency of circulating Tfh cells in mice post-**  
266 **infection.**

267 CXCR5<sup>+</sup>Bcl-6<sup>+</sup>Tfh cells can secrete IL-21 and are crucial for humoral responses [9].  
268 Recent studies indicate that ICOS positively regulates the Tfh development [8]. To  
269 understand the mechanisms underlying the action of ICOS over-expression in this model, we  
270 characterized the frequency of circulating Bcl-6<sup>+</sup>CD4<sup>+</sup>, CXCR5<sup>+</sup>CD4<sup>+</sup> and CXCR5<sup>+</sup>IL-21<sup>+</sup> T  
271 cells in total CD4<sup>+</sup> T cells in WT and ICOS-Tg mice at different time points post infection by  
272 flow cytometry analysis (Fig 3). Quantitative analysis indicated that the percentages of  
273 Bcl-6<sup>+</sup>CD4<sup>+</sup>, CXCR5<sup>+</sup>CD4<sup>+</sup> and CXCR5<sup>+</sup>IL-21<sup>+</sup> Tfh cells in both strains of mice gradually  
274 increased, as compared with that before infection and peaked at 12 weeks post infection,  
275 followed by slightly declined. Interestingly, the percentages of Bcl-6<sup>+</sup>CD4<sup>+</sup>, CXCR5<sup>+</sup>CD4<sup>+</sup>

276 and CXCR5<sup>+</sup>IL-21<sup>+</sup> Tfh cells in the ICOS-Tg mice were significantly higher than that in the  
277 WT mice. Similarly, further analysis revealed that the percentages of circulating ICOS<sup>+</sup>  
278 CXCR5<sup>+</sup>CD4<sup>+</sup> and CD40L<sup>+</sup>CXCR5<sup>+</sup>CD4<sup>+</sup> Tfh cells in the ICOS-Tg mice were significantly  
279 higher than that in the WT mice (Fig 4). Hence, induction of systemic ICOS over-expression  
280 enhanced Tfh responses in mice following *S. japonicum* infection.

281

282 **Fig 3. The frequency of splenic Tfh cells.** The frequency of splenic Bcl-6<sup>+</sup>CD4<sup>+</sup> (A),  
283 CXCR5<sup>+</sup>CD4<sup>+</sup> (B) and IL-21<sup>+</sup>CXCR5<sup>+</sup> (C) Tfh cells in the ICOS-Tg and WT mice was  
284 characterized longitudinally post infection by flow cytometry after staining with the indicated  
285 antibodies. The cells were first gated on splenic mononuclear cells and at least 10,000 events  
286 from each sample were analyzed. Data are representative charts and expressed as the mean ±  
287 SEM of the percentages of specific type of Tfh cells in each group (n=5 per group per time  
288 point) at the indicated time points post infection from three separate experiments. \**P*<0.05,  
289 \*\**P*<0.01, or \*\*\**P*<0.001 vs. the WT mice. Two-way ANOVA and Tukey's multiple  
290 comparison tests showed a significant genotype × time interaction effect for the Bcl-6  
291 (\**P*=0.028), CXCR5 (\**P*=0.033) and IL-21 (\**P*=0.016). The main effects showed a  
292 significant difference in the levels of Bcl-6, CXCR5 and IL-21 expression among different  
293 genotypes and different times point (\**P*<0.05 or \*\**P*<0.01).

294

295 **Fig 4. The frequency of splenic ICOS<sup>+</sup> or CD40L<sup>+</sup> Tfh cells.** The frequency of splenic  
296 ICOS<sup>+</sup>CXCR5<sup>+</sup>CD4<sup>+</sup> Tfh cells and CD40L<sup>+</sup>CXCR5<sup>+</sup>CD4<sup>+</sup> Tfh cells in the ICOS-Tg and WT  
297 mice was characterized by flow cytometry analysis and at least 10,000 events were analyzed.

298 Data are presentative charts and expressed as the mean  $\pm$  SEM of the percentages of  
299 ICOS<sup>+</sup>CXCR5<sup>+</sup>CD4<sup>+</sup> Tfh cells (**A**) and CD40L<sup>+</sup>CXCR5<sup>+</sup>CD4<sup>+</sup> Tfh cells (**B**) in each group  
300 (n=5 per group per time point) at the indicated time points post infection from three separate  
301 experiments. \* $P$ <0.05, \*\* $P$ <0.01, or \*\*\* $P$ <0.001 vs. the WT mice. Two-way ANOVA and  
302 Tukey's multiple comparison tests showed a significant genotype  $\times$  time interaction effect for  
303 the ICOS<sup>+</sup> Tfh cells (\*\* $P$ =0.001) and CD40L<sup>+</sup> Tfh cells (\* $P$ =0.049). The main effects showed  
304 a significant difference in the percentages of ICOS<sup>+</sup> Tfh cells and CD40L<sup>+</sup> Tfh cells among  
305 different genotypes and different times point (\* $P$ <0.05 or\*\* $P$ <0.01).

306

307 **ICOS over-expression promotes antigen-specific Tfh, Th2 and Th17 responses in mice**  
308 **post-infection**

309 To further elucidate the role of ICOS-ICOSL signaling in modulating Tfh responses,  
310 we isolated splenic mononuclear cells from the ICOS-Tg and WT mice at different time  
311 points post *S. japonicum* infection and stimulated them with SEA in the presence or absence  
312 of anti-ICOS or anti-ICOSL in vitro, followed by measuring cytokines in the supernatants by  
313 CBA. Although the levels of IL-2 and TNF- $\alpha$  increased for a short period post infection in  
314 both groups of mice, there was no significant difference in the levels of IL-2 between the  
315 ICOS-Tg and WT mice regardless the presence or absence of anti-ICOS or anti-ICOSL (Fig  
316 5A and B). Similarly, the levels of IFN- $\gamma$  also increased for a short period post infection. The  
317 levels of IFN- $\gamma$  in the supernatants of cultured splenic mononuclear cells from the ICOS-Tg  
318 mice were significantly lower than that in the WT mice (Fig 5C). The levels of IFN- $\gamma$   
319 increased dramatically after treatment with anti-ICOS or anti-ICOSL in the supernatants of

320 cultured splenic mononuclear cells from the ICOS-Tg mice, but not from WT mice in most  
321 time points tested. Furthermore, the levels of IL-4, IL-10, IL-13, IL-17A, IL-21 and TGF- $\beta$ 1  
322 gradually increased in both groups of mice, peaked at 12 weeks post infection and slightly  
323 declined (Fig 5D-I). The levels of IL-4, IL-10, IL-13, IL-17A, IL-21 and TGF- $\beta$ 1 in the  
324 supernatants of cultured splenic mononuclear cells from the ICOS Tg mice were significantly  
325 higher than that in the WT mice. Similarly, treatment with anti-ICOS or anti-ICOSL also  
326 significantly reduced the levels of IL-4, IL-10, IL-13, IL-17A, IL-21 and TGF- $\beta$ 1 in the  
327 supernatants of cultured splenic mononuclear cells from the ICOS Tg mice (Fig 5D-I). These  
328 data clearly demonstrated that induction of systemic ICOS over-expression promoted Tfh,  
329 Th2 and Th17 responses in mice infection with *S. japonicum*.

330 Then, we determined the HA titers in ICOS-Tg mice following *S. japonicum* infection  
331 and analyzed the potential correlation between the levels of HA and the levels of serum IL-4,  
332 IL-13, TGF- $\beta$ 1, and IL-21 (Fig 6A-D). The levels of serum IL-4, IL-13, and TGF- $\beta$ 1 were  
333 positively correlated with the HA titers in ICOS-Tg mice following *S. japonicum* infection  
334 (Fig 6E;  $P < 0.01$  or  $P < 0.001$ ). Importantly, the levels of serum IL-21 were also positively  
335 correlated with the HA titers in ICOS Tg mice following *S. japonicum* infection ( $P < 0.05$ )  
336 (Fig 6D and E). These data suggest that ICOSL/ICOS interactions play a key role in Tfh, Th2  
337 and Th17 responses, which are identified as pertinent to fibrosis.

338

339 **Fig 5. The dynamic changes in the cytokine production by splenocytes from the ICOS-**  
340 **Tg and WT mice.** Female ICOS-Tg and WT mice were infected with *S. japonicum*. Splenic  
341 mononuclear cells were prepared from each group before and at 4, 7, 12, 16, or 20 weeks



342 post-infection and stimulated in triplicate with SEA, PMA and ionomycin in the presence or  
343 absence of anti-ICOS or anti-ICOSL for 72 hrs. The supernatants were harvested and the  
344 concentrations of (A) IL-2, (B) TNF- $\alpha$ , (C) IFN- $\gamma$ , (D) IL-4, (E) IL-10, (F) IL-13, (G)  
345 IL-17A, (H) IL-21 and (I) TGF- $\beta$ 1 were determined by CBA. Data are expressed as the mean  
346  $\pm$  SEM of the concentrations of each cytokine in individual group of mice (n=5 per group, per  
347 time point) from three independent experiments. <sup>3/</sup> $P < 0.05$  between ICOS-Tg and the WT  
348 mice, <sup>1</sup> $P < 0.05$  between ICOS-Tg and Tg-ICOSL-blocking mice, <sup>▼</sup> $P < 0.05$  between ICOS-Tg  
349 and Tg-ICOS-blocking mice. Two-way ANOVA and Tukey's multiple comparison tests  
350 showed a significant genotype  $\times$  time interaction effect for the IFN- $\gamma$  (\* $P=0.046$ ), IL-4  
351 (\*\* $P=0.005$ ), IL-10 (\* $P=0.031$ ), IL-13 (\*\* $P < 0.01$ ), IL-17A (\* $P=0.038$ ), IL-21 (\* $P=0.028$ )  
352 and TGF- $\beta$ 1 (\*\* $P=0.004$ ). The main effects showed a significant difference among different  
353 genotypes and different time points in the level of IL-2, TNF- $\alpha$ , IFN- $\gamma$ , IL-4, IL-10, IL-13,  
354 IL-17A, IL-21 and TGF- $\beta$ 1 (\* $P < 0.05$  or \*\* $P < 0.01$ ).

355

356 **Fig 6. The analysis of correlation of Th2 / Tfh and fibrosis.** The linear relationship of IL-4  
357 (A:  $R=0.4727$ , \*\* $P=0.0083$ ), IL-13 (B:  $R=0.5306$ , \*\* $P=0.0026$ ), TGF- $\beta$ 1 (C:  $R=0.5858$ ,  
358 \*\*\* $P=0.0007$ ), IL-21 (D:  $R=0.4234$ , \* $P=0.0197$ ) and HA. The results are a representative of  
359 three independent experiments with similar results, which are from 6 time points (at 0, 4, 7,  
360 12, 16, 20 weeks) (E). The comparison of Spearman R from the analysis of correlation. The  
361 Spearman R from the analysis of correlation between IL-4 / IL-13 / TGF- $\beta$ 1 / IL-21 and HA.  
362 \* $P < 0.05$ , \*\* $P < 0.01$ , and \*\*\* $P < 0.001$  between cytokine and HA, Spearman's rank.

363

364 **ICOS over-expression enhances antigen-specific humoral responses and Tfh liver**

365 **infiltration in mice post-infection.**

366 Tfh cells can promote humoral response. Finally, we assessed the impact of systemic  
367 ICOS over-expression on SEA-specific humoral responses and on the degrees of liver Tfh  
368 infiltration in mice at different time points post *S. japonicum* infection. We found that *S.*  
369 *japonicum* infection induced SEA-specific IgG responses, which gradually increased and  
370 peaked at 12 weeks post infection in both groups of mice. The levels of serum SEA-specific  
371 IgG in the ICOS-Tg mice were significantly higher than that in the WT mice at chronic stage  
372 of *S. japonicum* infection (Fig 7A). Immunohistochemistry analyses indicated that the  
373 intensity and extensity of positively anti-BCL-6 and anti-CXCR5 staining in the liver sections  
374 of ICOS-Tg mice were obviously stronger than that in the WT mice at 12 weeks post  
375 infection (Fig 7B). Quantitative analysis revealed that the ratios of IOD to AOV1 for  
376 anti-Bcl-6 and anti-CXCR5 staining in the livers of ICOS Tg mice were significantly greater  
377 than that in the WT mice at 12 weeks post infection (Fig 7C). Therefore, these data clearly  
378 indicated that induction of systemic ICOS over-expression promoted antigen-specific  
379 humoral responses and Tfh liver infiltration in mice following *S. japonicum* infection.

380

381 **Fig 7. The concentrations of serum SEA-specific IgG and the intensity of Tfh liver**

382 **infiltration liver in mice.** The concentrations of serum anti-SEA IgG in the ICOS-Tg and  
383 WT mice at the indicated time points post infection were determined by ELISA (A) and the  
384 degrees of Tfh infiltrates in the livers of both groups of mice at 12 weeks post infection were  
385 determined by immunohistochemistry using anti-Bcl-6 and anti-CXCR5 (B). The intensity of

386 anti-Bcl-6 and anti-CXCR5 staining was analyzed by the % positively staining cells in 15  
387 granulomas (C). Data are representative images and expressed as the mean  $\pm$  SEM of the  
388 concentrations of serum IgG and the mean of % positively staining cells in 15 granulomas +/-  
389 SD of each group of mice (n=5 per group per time point) from three separate experiments.  
390 \* $P$ <0.05, \*\* $P$ <0.01, or \*\*\* $P$ <0.001 vs. the WT mice. Two-way ANOVA and Tukey's  
391 multiple comparison tests showed no significant genotype  $\times$  time interaction effect for the  
392 concentrations of serum anti-SEA IgG ( $P$ =0.08). The main effects showed a significant  
393 difference in the changes of the liver/spleen weights among different time points and different  
394 genotypes (\*\* $P$ <0.01).

395

## 396 **Discussion**

397 Tfh cells are crucial for B cell activation, germinal center formation and humoral  
398 responses [7]. ICOS, besides CD40L and CD28, is important for T cell activation,  
399 particularly for Tfh cells. In this study, we tested the impact of systemic ICOS over-  
400 expression on the dynamics of liver granulomatous inflammation and fibrosis in mice  
401 following *S. japonicum* infection. We found that in comparison with that in the WT mice,  
402 larger liver and spleens organs and greater wet liver and spleen weights were observed,  
403 accompanied by significantly severer liver granulomatous inflammation and fibrosis in the  
404 ICOS-Tg mice. As a result, the ICOS-Tg mice had significantly shorter survival following *S.*  
405 *japonicum* infection. Clearly, these data demonstrated that systemic ICOS over-expression  
406 promoted the liver granulomatous inflammation, fibrosis and mortality in mice following *S.*  
407 *japonicum* infection. These novel findings indicated that systemic ICOS over-expression not

408 only promoted the liver granulomatous inflammation and fibrosis, but also accelerated the  
409 mortality in *S. japonicum*-infected mice.

410         Recent studies have shown that the ICOS signaling can promote Tfh cell differentiation  
411 and IL-21 production [9,10]. To understand the mechanisms underlying the action of ICOS  
412 over-expression, we characterized the frequency of splenic Tfh cells in the ICOS-Tg and WT  
413 mice following *S. japonicum* infection. We found that the percentages of Bcl-6<sup>+</sup>CD4<sup>+</sup>,  
414 CXCR5<sup>+</sup>CD4<sup>+</sup>, CXCR5<sup>+</sup>IL-21<sup>+</sup> and CD40L<sup>+</sup>CXCR5<sup>+</sup>CD4<sup>+</sup> Tfh cells gradually increased in  
415 both groups of mice following *S. japonicum* infection and the percentages of these Tfh cells  
416 in the ICOS-Tg mice were significantly higher than that in the WT mice. These data indicated  
417 that ICOS enhanced Tfh development during the process of *S. japonicum* infection. It is  
418 possible that ICOS may up-regulate the CXCR5 and Bcl-6 expression to promote the  
419 differentiation of Tfh cells. More importantly, we observed significantly higher levels of  
420 IL-21 secreted by splenic mononuclear cells from ICOS-Tg mice following *S. japonicum*  
421 infection. Given that IL-21 is a growth factor and important for the function of Tfh cells, it is  
422 possible that the ICOS signaling may also enhance IL-21 expression, providing a positive  
423 feedback regulation of Tfh responses. The higher frequency of Tfh cells, the higher levels of  
424 IL-21 production may activate and expand memory B cells, thereby enhancing humoral  
425 responses. Indeed, we detected significantly higher levels of SEA-specific humoral responses  
426 in the ICOS-Tg mice. Apparently, ICOS through promoting Tfh development and in turn  
427 enhancing humoral responses, contributes to the pathogenesis of granulomatous inflammation  
428 and fibrosis in mice following *S. japonicum* infection. Potentially, ICOS and Tfh may be  
429 immune check points for the prevention and intervention of *Schistosoma*-related

430 granulomatous inflammation and fibrosis.

431         It is well known that Th2 and Th17 responses are involved in the pathogenesis of  
432 *Schistosoma*-related granulomatous inflammation and fibrosis. In this study, we found that  
433 significantly higher levels of SEA-specific Th2 and Th17 responses in the ICOS-Tg mice,  
434 which was abrogated by treatment with a blocker of the ICOS/ICOSL signaling. These data  
435 suggest that the ICOS signaling may promote Th2 and Th17 responses during the pathogenic  
436 process of *Schistosoma*-related granulomatous inflammation and fibrosis. Our findings were  
437 consistent with previous observations that the ICOS expands Th2 immunity and Th2-  
438 mediated inflammation by augmenting the migration of inflammatory infiltrates [25,26].  
439 Interestingly, we also detected significantly higher levels of IL-10 and TGF- $\beta$ 1 responses in  
440 the ICOS-Tg mice. Given that IL-10 and TGF- $\beta$ 1 are important anti-inflammatory cytokines  
441 secreted by regulatory T cells (Tregs), the enhanced anti-inflammatory responses may inhibit  
442 the liver granulomatous inflammation. Hence, the ICOS signaling has dual functions by  
443 promoting pathogenic Th2 and Th17 responses and enhancing anti-inflammatory IL-10 and  
444 TGF- $\beta$ 1 responses during the pathogenesis of *Schistosoma*-related granulomatous  
445 inflammation. Unfortunately, TGF- $\beta$ 1 is potent pro-fibrotic factor and through its receptor to  
446 activate the Smad signaling to promote fibrosis-related gene expression [27,28]. It is possible  
447 that the ICOS signaling through enhancing TGF- $\beta$ 1 production contributes to the  
448 pathogenesis of *Schistosoma*-related liver fibrosis. Therefore, inhibition of the ICOS  
449 signaling may not only attenuate hepatic granulomatous inflammation, but also mitigate  
450 *Schistosoma*-related liver fibrosis.

451         In summary, our data indicated that systemic ICOS over-expression deteriorated the

452 pathogenic process of *Schistosoma*-related liver granulomatous inflammation and fibrosis and  
453 accelerated mortality in mice. Furthermore, systemic ICOS over-expression not only  
454 significantly increased the frequency of splenic Tfh cells, but also enhanced SEA-specific  
455 Th2, Th17, IgG, IL-21, IL-10 and TGF- $\beta$ 1 responses in mice following *S. japonicum*  
456 infection. Hence, the ICOS signaling has sequential roles in regulating the *Schistosoma*-  
457 related liver granulomatous inflammation and fibrosis in mice. Importantly, the ICOS  
458 signaling may be an immune check point for the prevention and intervention of *Schistosoma*-  
459 related liver granulomatous inflammation and fibrosis. Therefore, our findings may not only  
460 provide new insights into the mechanisms by which the ICOS regulates the pathogenesis of  
461 *Schistosoma*-related liver granulomatous inflammation and fibrosis, but also may aid in the  
462 design of new therapies for the intervention of *Schistosoma*-induced fibrosis.

463

464

## 465 **References**

- 466 1. Nono JK, Ndlovu H, Aziz NA, Mpotje T, Hlaka L, Brombacher F. Host regulation of  
467 liver fibroproliferative pathology during experimental schistosomiasis via interleukin-4  
468 receptor alpha. *PLoS Negl Trop Dis*. 2017 Aug 21;11(8):e0005861. doi:  
469 10.1371/journal.pntd.0005861. PMID: 28827803; PMCID: PMC5578697.
- 470 2. Vicentino ARR, Carneiro VC, Allonso D, Guilherme RF, Benjamim CF, Vicentino ARR,  
471 et al. Emerging Role of HMGB1 in the pathogenesis of schistosomiasis liver fibrosis.  
472 *Front Immunol*. 2018 Sep 12;9:1979. doi: 10.3389/fimmu.2018.01979. PMID:  
473 30258438; PMCID: PMC6143665.
- 474 3. Kumar R, Mickael C, Kassa B, Sanders L, Koyanagi D, Hernandez-Saavedra D, et al.  
475 Th2 CD4+ T Cells are necessary and sufficient for Schistosoma-pulmonary  
476 hypertension. *J Am Heart Assoc*. 2019 Aug 6;8(15):e013111. doi: 10.1161/JAHA.  
477 119.013111. Epub 2019 Jul 24. PMID: 31339057; PMCID: PMC6761627.
- 478 4. Soloviova K, Fox EC, Dalton JP, Caffrey CR, Davies SJ. A secreted schistosome  
479 cathepsin B1 cysteine protease and acute schistosome infection induce a transient T  
480 helper 17 response. *PLoS Negl Trop Dis*. 2019 Jan 17;13(1): e0007070. doi: 10.1371/  
481 journal.pntd.0007070. PMID: 30653492; PMCID: PMC6353221.
- 482 5. Wang B, Liang S, Wang Y, Zhu XQ, Gong W, Zhang HQ, et al. Th17 down-regulation  
483 is involved in reduced progression of schistosomiasis fibrosis in ICOSL KO mice.  
484 *PLoS Negl Trop Dis*. 2015 Jan 15;9(1):e0003434. doi: 10.1371/journal.pntd.0003434.  
485 PMID: 25590646; PMCID: PMC4295877.
- 486 6. Qin L, Waseem TC, Sahoo A, Bieberkehazhi S, Zhou H, Galkina EV, et al. Insights into

- 487 the molecular mechanisms of T follicular helper-mediated immunity and pathology.  
488 Front Immunol. 2018 Aug 15;9:1884. doi: 10.3389/fimmu.2018.01884. PMID:  
489 30158933; PMCID: PMC6104131.
- 490 7. Wu H, Deng Y, Zhao M, Zhang J, Zheng M, Chen G, et al. Molecular control of  
491 follicular helper T cell development and differentiation. Front Immunol. 2018 Oct  
492 25;9:2470. doi: 10.3389/fimmu.2018.02470. PMID: 30410493; PMCID:  
493 PMC6209674.
- 494 8. Uwadiae FI, Pyle CJ, Walker SA, Lloyd CM, Harker JA. Targeting the ICOS/ICOS-L  
495 pathway in a mouse model of established allergic asthma disrupts T follicular helper  
496 cell responses and ameliorates disease. Allergy. 2019 Apr;74(4):650-662. doi: 10.1111/  
497 all.13602. Epub 2018 Nov 12. PMID: 30220084; PMCID: PMC6492018.
- 498 9. Wang Y, Lin C, Cao Y, Duan Z, Guan Z, Xu J, et al. Up-regulation of interleukin-21  
499 contributes to liver pathology of schistosomiasis by driving GC immune responses and  
500 activating HSCs in mice. Sci Rep. 2017 Nov 30;7(1):16682. doi: 10.1038/  
501 s41598-017-16783-7. PMID: 29192177; PMCID: PMC5709429.
- 502 10. Shi J, Hou S, Fang Q, Liu X, Liu X, Qi H. PD-1 controls follicular T helper cell  
503 positioning and function. Immunity. 2018 Aug 21;49(2):264-274.e4. doi: 10.1016/  
504 j.immuni.2018.06.012. Epub 2018 Jul 31. PMID: 30076099; PMCID: PMC6104813.
- 505 11. Read KA, Powell MD, Oestreich KJ. T follicular helper cell programming by  
506 cytokine-mediated events. Immunology. 2016 Nov;149(3):253-261. doi:10.1111/  
507 imm.12648. Epub 2016 Aug 16. PMID: 27442976; PMCID: PMC5046059.
- 508 12. Kim ST, Choi JY, Lainez B, Schulz VP, Karas DE, Baum ED, et al. Human



- 509           extrafollicular CD4<sup>+</sup> Th cells help memory B cells produce Igs. *J Immunol.* 2018 Sep  
510           1;201(5):1359-1372. doi: 10.4049/jimmunol.1701217. Epub 2018 Jul 20. PMID:  
511           30030323; PMCID: PMC6112860.
- 512 13.   Xie MM, Dent AL. Unexpected Help: Follicular regulatory T cells in the germinal  
513           center. *Front Immunol.* 2018 Jul 2;9:1536. doi: 10.3389/fimmu.2018.01536. PMID:  
514           30013575; PMCID: PMC6036241.
- 515 14.   Gensous N, Charrier M, Duluc D, Contin-Bordes C, Truchetet ME, Lazaro E, et al. T  
516           follicular helper cells in autoimmune disorders. *Front Immunol.* 2018 Jul 17;9: 1637.  
517           doi: 10.3389/fimmu.2018.01637. PMID: 30065726; PMCID: PMC6056609.
- 518 15.   Quinn JL, Axtell RC. Emerging role of follicular T helper cells in multiple sclerosis  
519           and experimental autoimmune encephalomyelitis. *Int J Mol Sci.* 2018 Oct 19;19(10):  
520           3233. doi: 10.3390/ijms19103233. PMID: 30347676; PMCID: PMC6214126.
- 521 16.   Cao G, Chi S, Wang X, Sun J, Zhang Y. CD4<sup>+</sup>CXCR5<sup>+</sup>PD-1<sup>+</sup> T follicular helper cells  
522           play a pivotal role in the development of rheumatoid arthritis. *Med Sci Monit.* 2019  
523           Apr 25;25:3032-3040. doi:10.12659/MSM.914868. PMID: 31019190; PMCID:  
524           PMC6498883.
- 525 17.   Chen X, Li W, Zhang Y, Song X, Xu L, Xu Z, et al. Distribution of peripheral memory  
526           T follicular helper cells in patients with schistosomiasis Japonica. *PLoS Negl Trop*  
527           *Dis.* 2015 Aug 18;9(8):e0004015. doi: 10.1371/journal.pntd.0004015. PMID:  
528           26284362; PMCID: PMC4540279.
- 529 18.   Zhang Y, Wang Y, Jiang Y, Pan W, Liu H, Yin J, et al. T follicular helper cells in  
530           patients with acute schistosomiasis. *Parasit Vectors.* 2016 Jun 6;9(1):321. doi:10.1186/

- 531 s13071-016-1602-6. PMID: 27266984; PMCID: PMC4895967.
- 532 19. Chen X, Yang X, Li Y, Zhu J, Zhou S, Xu Z, et al. Follicular helper T cells promote  
533 liver pathology in mice during *Schistosoma japonicum* infection. PLoS Pathog. 2014  
534 May 1;10(5):e1004097. doi: 10.1371/journal.ppat.1004097. PMID: 24788758;  
535 PMCID: PMC4006917.
- 536 20. Wikenheiser DJ, Stumhofer JS. ICOS co-stimulation: friend or foe? Front Immunol.  
537 2016 Aug 10;7:304. doi: 10.3389/fimmu.2016.00304. PMID: 27559335; PMCID:  
538 PMC4979228.
- 539 21. Le KS, Amé-Thomas P, Tarte K, Gondois-Rey F, Granjeaud S, Orlanducci F, et al.  
540 CXCR5 and ICOS expression identifies a CD8 T-cell subset with T<sub>FH</sub> features in  
541 Hodgkin lymphomas. Blood Adv. 2018 Aug 14;2(15): 1889-1900. doi: 10.1182/  
542 bloodadvances.2018017244. PMID: 30087107; PMCID: PMC6093730.
- 543 22. Liu J, Zhou Y, Yu Q, Zhao Z, Wang H, Luo X, et al. Higher Frequency of  
544 CD4+CXCR5+ICOS+PD1+ T follicular helper cells in patients with infectious  
545 mononucleosis. Medicine (Baltimore). 2015 Nov;94(45):e2061. doi: 10.1097/MD.  
546 0000000000002061. PMID: 26559315; PMCID: PMC4912309.
- 547 23. Jogdand GM, Sengupta S, Bhattacharya G, Singh SK, Barik PK, Devadas S. Inducible  
548 costimulator expressing T cells promote parasitic growth during blood  
549 stage *plasmodium berghei* ANKA infection. Front Immunol. 2018 May 28;9:1041. doi:  
550 10.3389/fimmu.2018.01041. PMID: 29892278; PMCID: PMC5985291.
- 551 24. Wikenheiser DJ, Ghosh D, Kennedy B, Stumhofer JS. The costimulatory molecule  
552 ICOS regulates host Th1 and follicular Th Cell differentiation in response to

- 553 plasmodium chabaudi chabaudi AS infection. *J Immunol.* 2016 Jan 15;196(2):778-91.  
554 doi: 10.4049/jimmunol.1403206. Epub 2015 Dec 14. PMID: 26667167; PMCID:  
555 PMC4705592.
- 556 25. Tesciuba AG, Shilling RA, Agarwal MD, Bandukwala HS, Clay BS, Moore TV, et al.  
557 ICOS costimulation expands Th2 immunity by augmenting migration of lymphocytes  
558 to draining lymph nodes. *J Immunol.* 2008 Jul 15;181(2):1019- 24. doi: 10.4049/  
559 jimmunol.181.2.1019. PMID: 18606653; PMCID: PMC2560985.
- 560 26. Shilling RA, Clay BS, Tesciuba AG, Berry EL, Lu T, Moore TV, et al. CD28 and ICOS  
561 play complementary non-overlapping roles in the development of Th2 immunity in  
562 vivo. *Cell Immunol.* 2009;259(2):177-84. doi:10.1016/j.cellimm.2009.06.013. Epub  
563 2009 Jul 10. PMID: 19646680; PMCID: PMC2748173.
- 564 27. Ahamed J, Laurence J. Role of platelet-derived transforming growth factor- $\beta$ 1 and  
565 reactive oxygen species in radiation-induced organ fibrosis. *Antioxid Redox Signal.*  
566 2017 Nov 1;27(13):977-988. doi: 10.1089/ars. 2017.7064. Epub 2017 Jul 5. PMID:  
567 28562065; PMCID: PMC5649128.
- 568 28. Jee MH, Hong KY, Park JH, Lee JS, Kim HS, Lee SH, et al. New mechanism of  
569 hepatic fibrogenesis: hepatitis C virus infection induces transforming growth factor  $\beta$ 1  
570 production through glucose-regulated protein 94. *J Virol.* 2015 Dec 30;90(6):3044-55.  
571 doi: 10.1128/JVI.02976-15. PMID: 26719248; PMCID: PMC4810663.

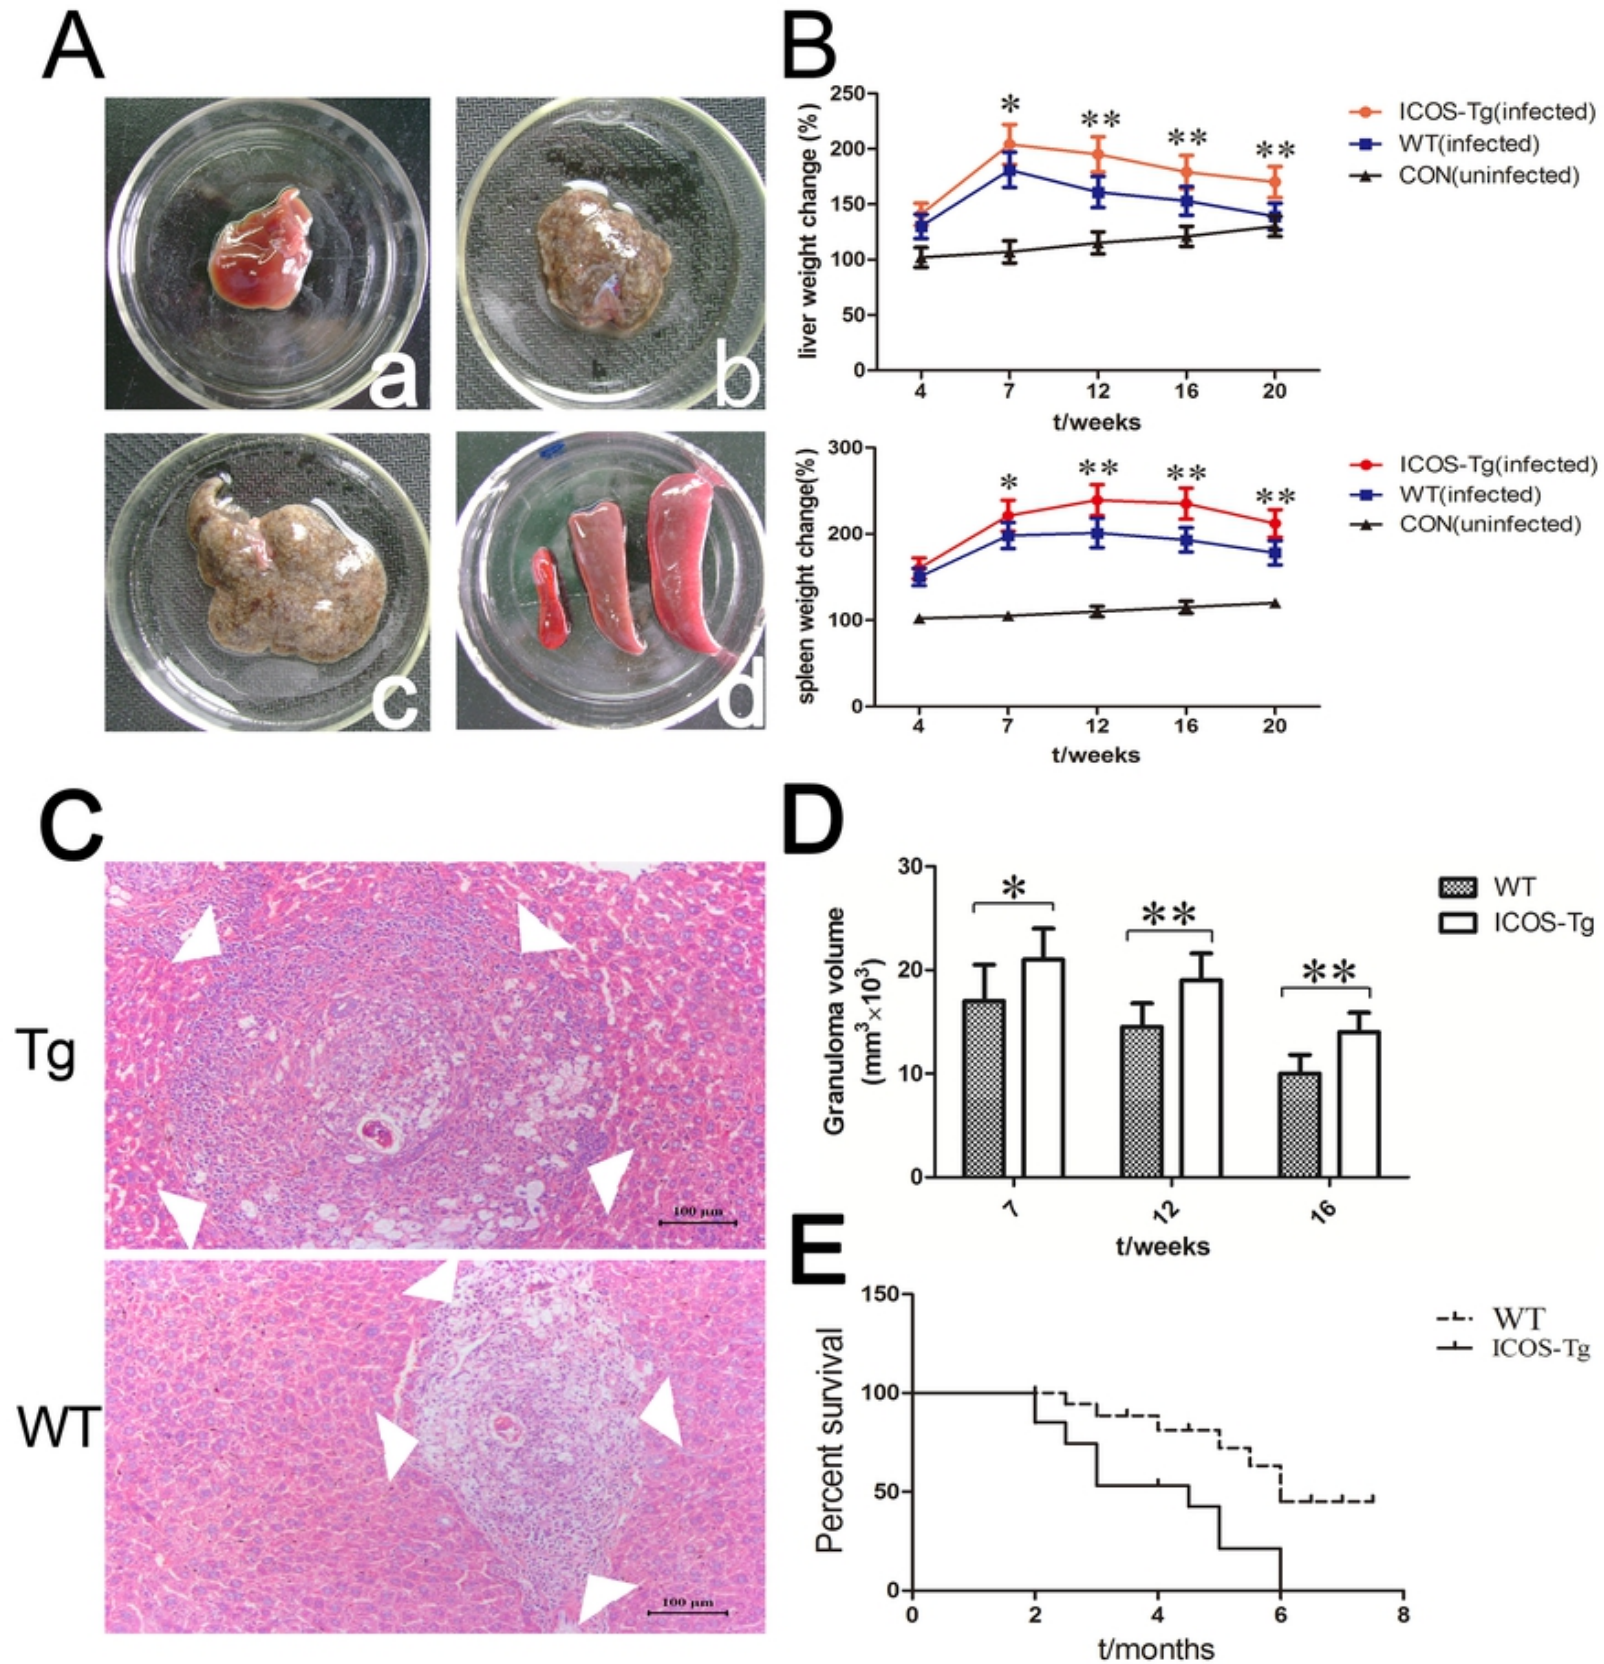

Figure

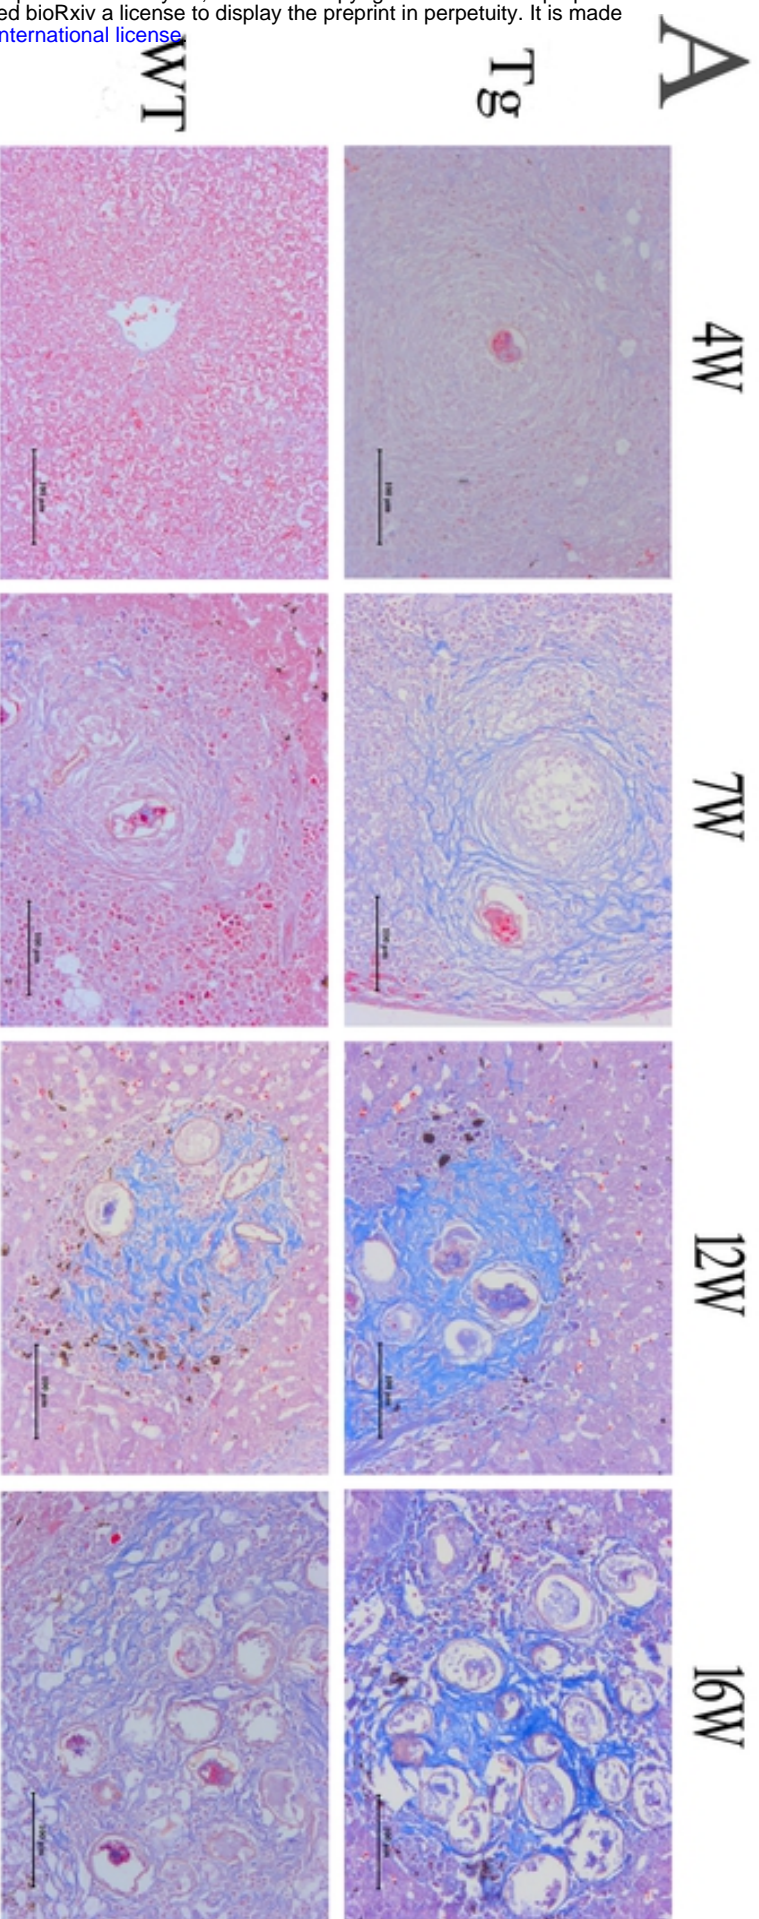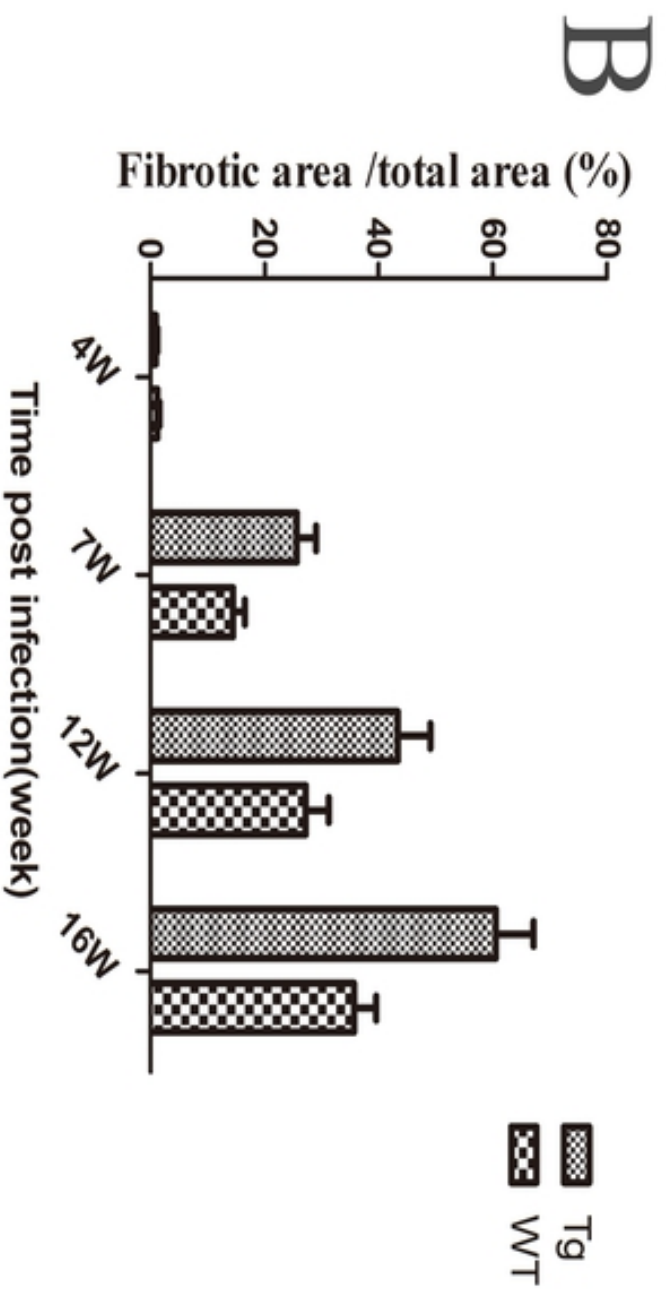

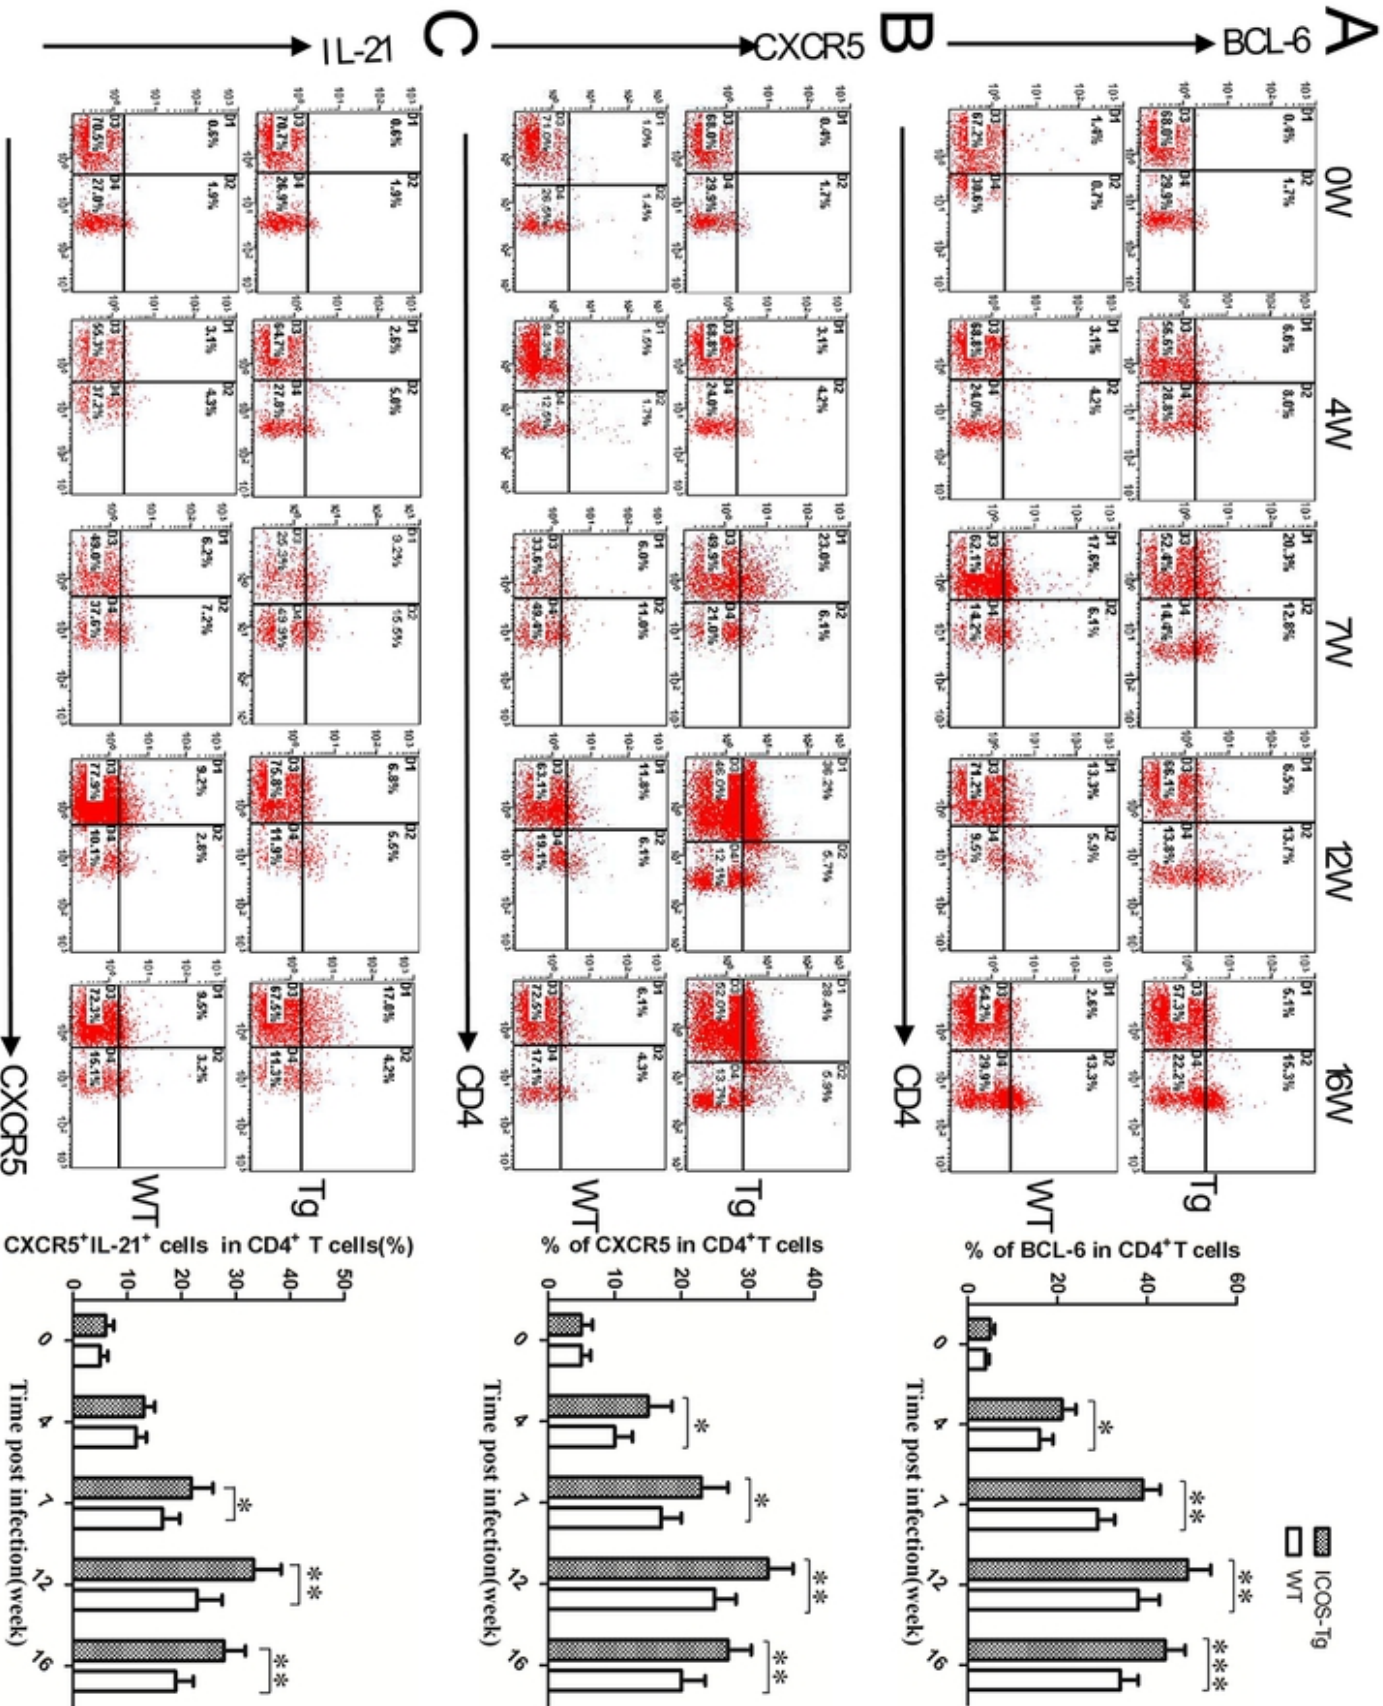

Figure

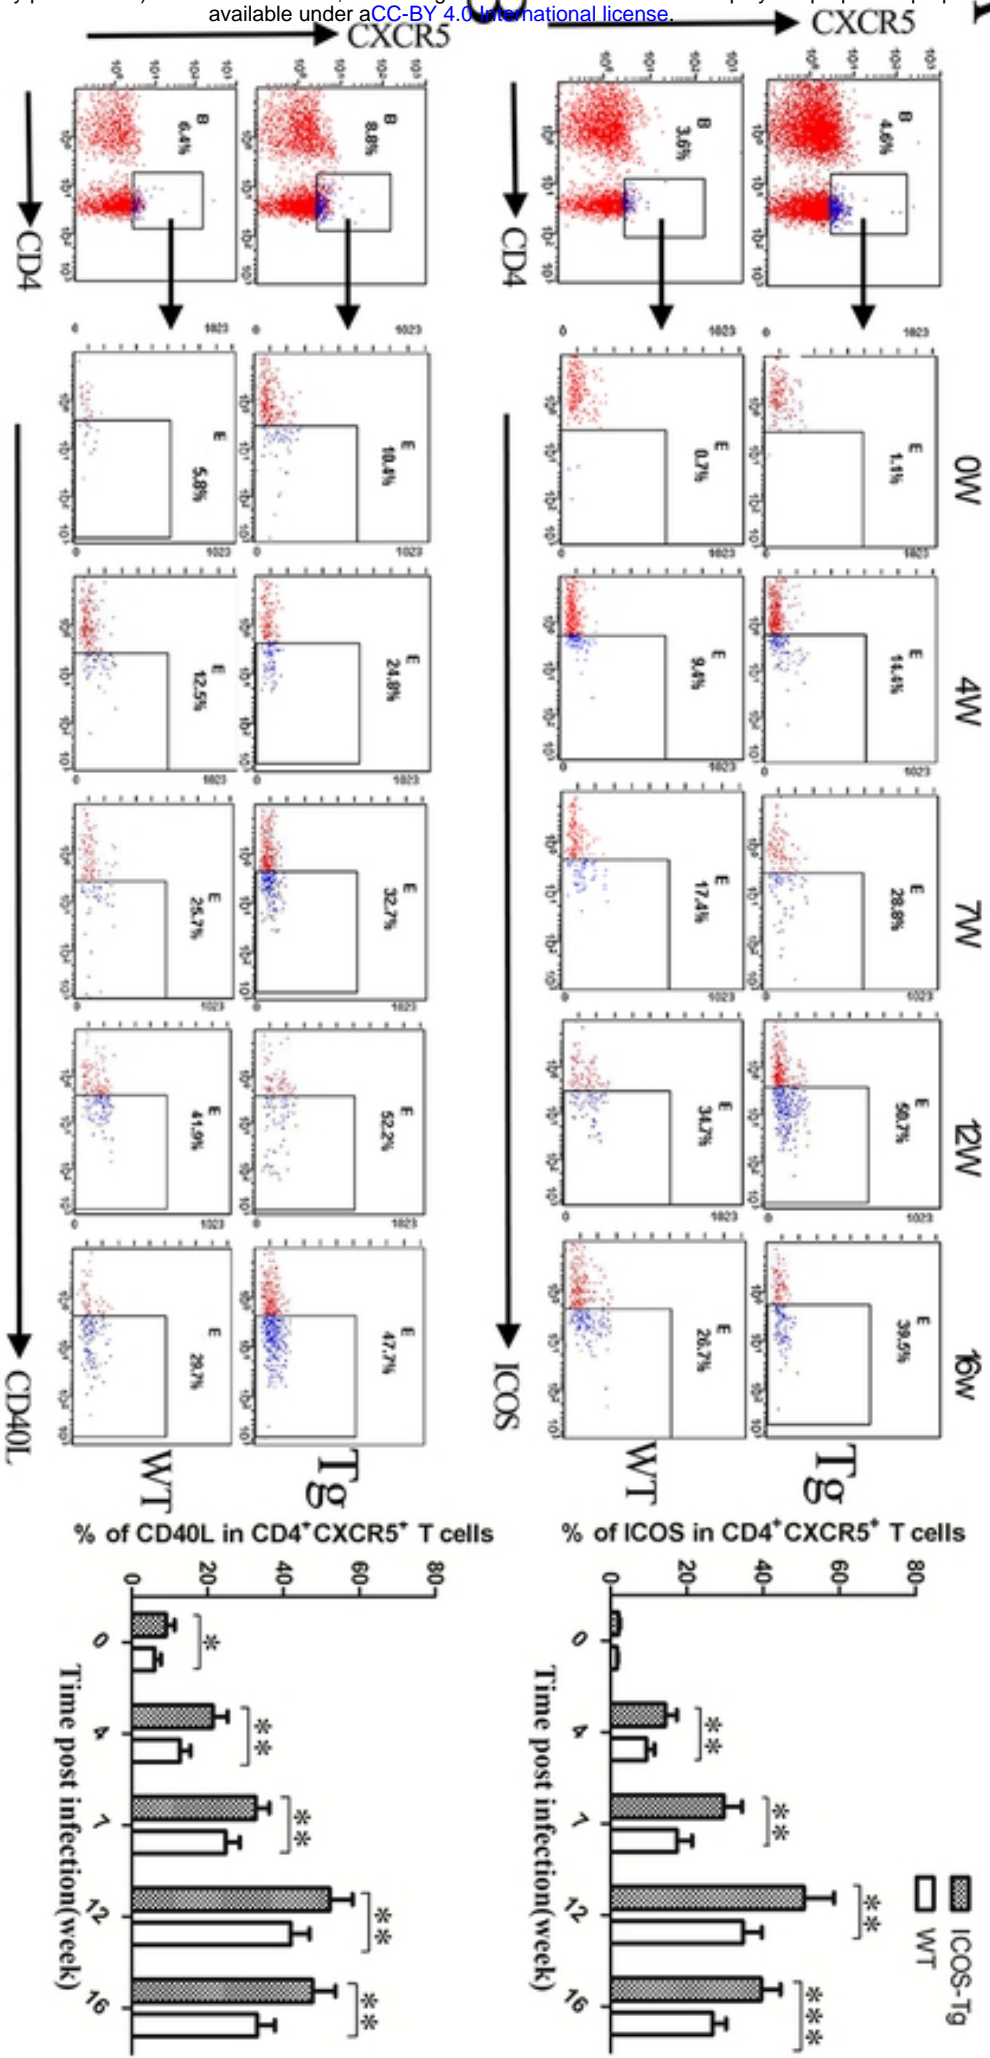

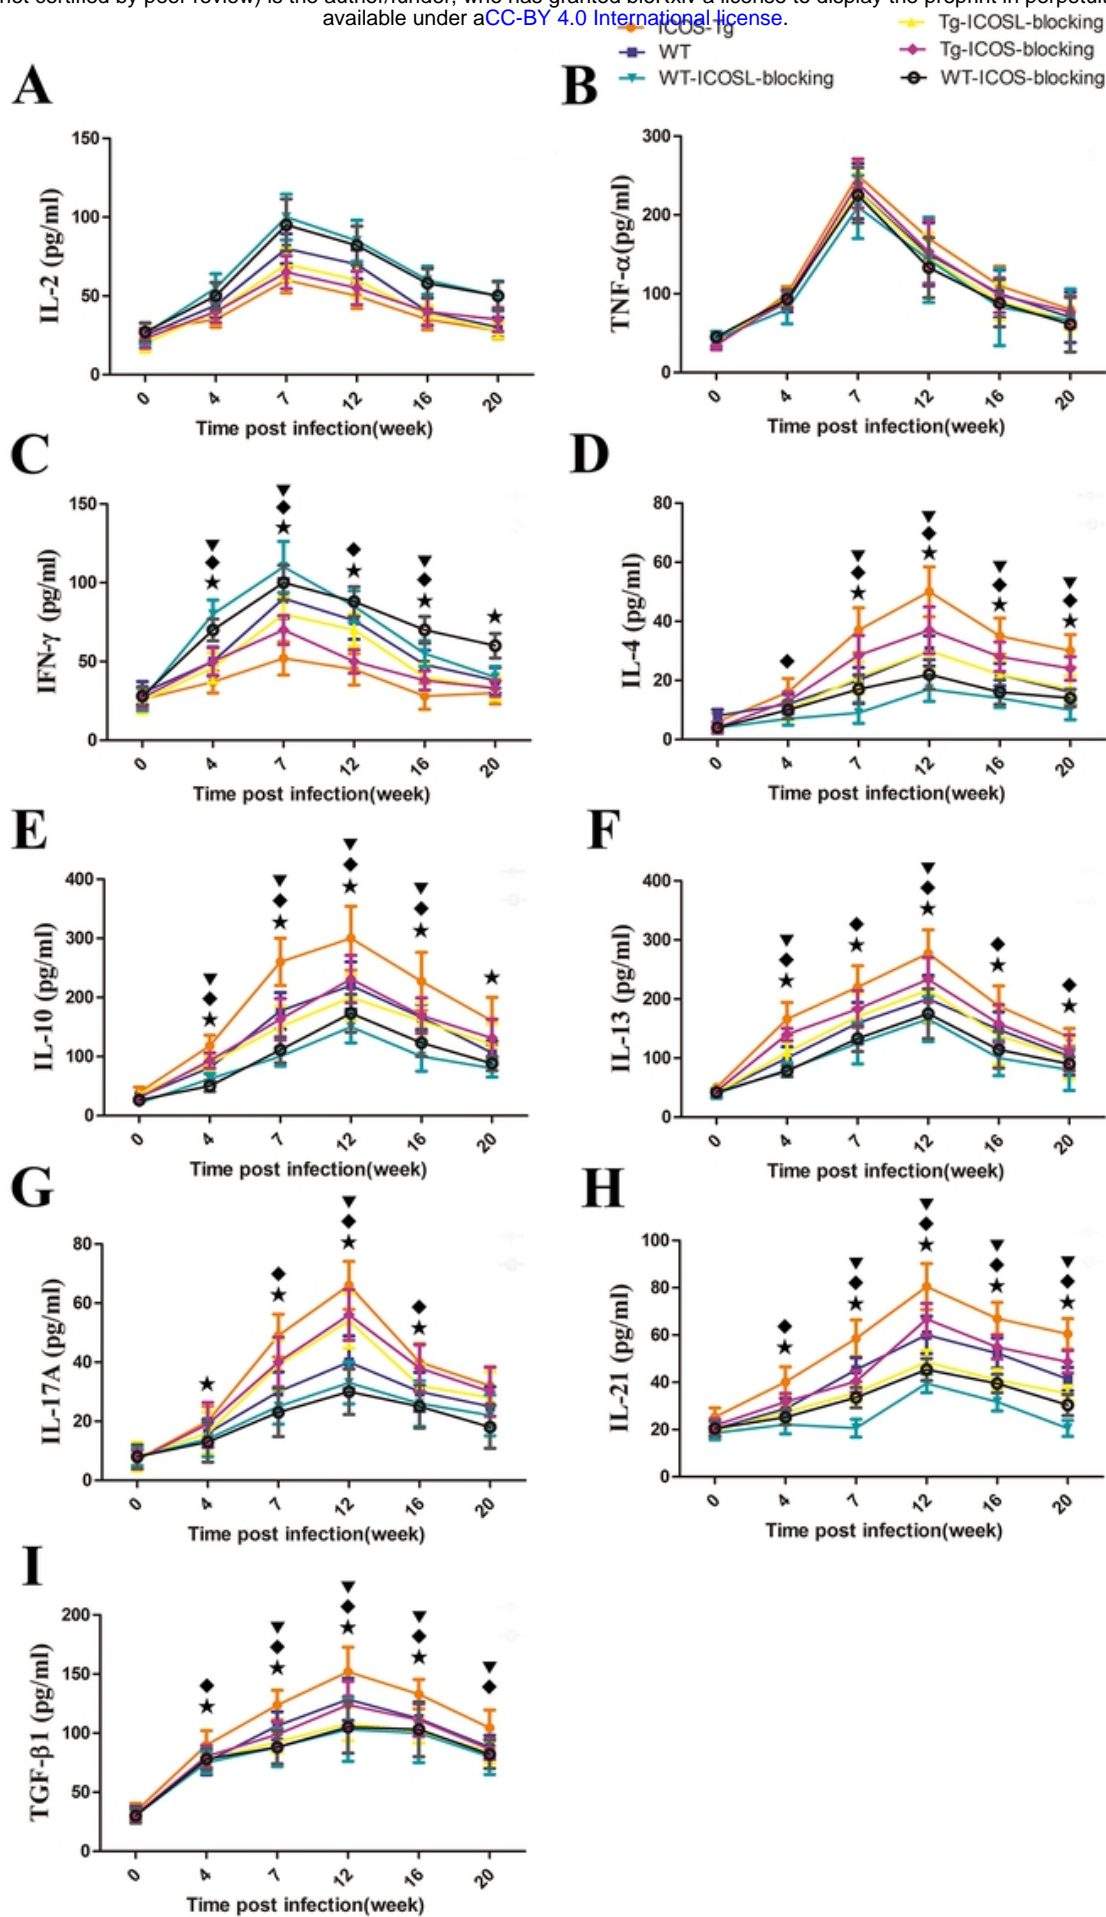

Figure



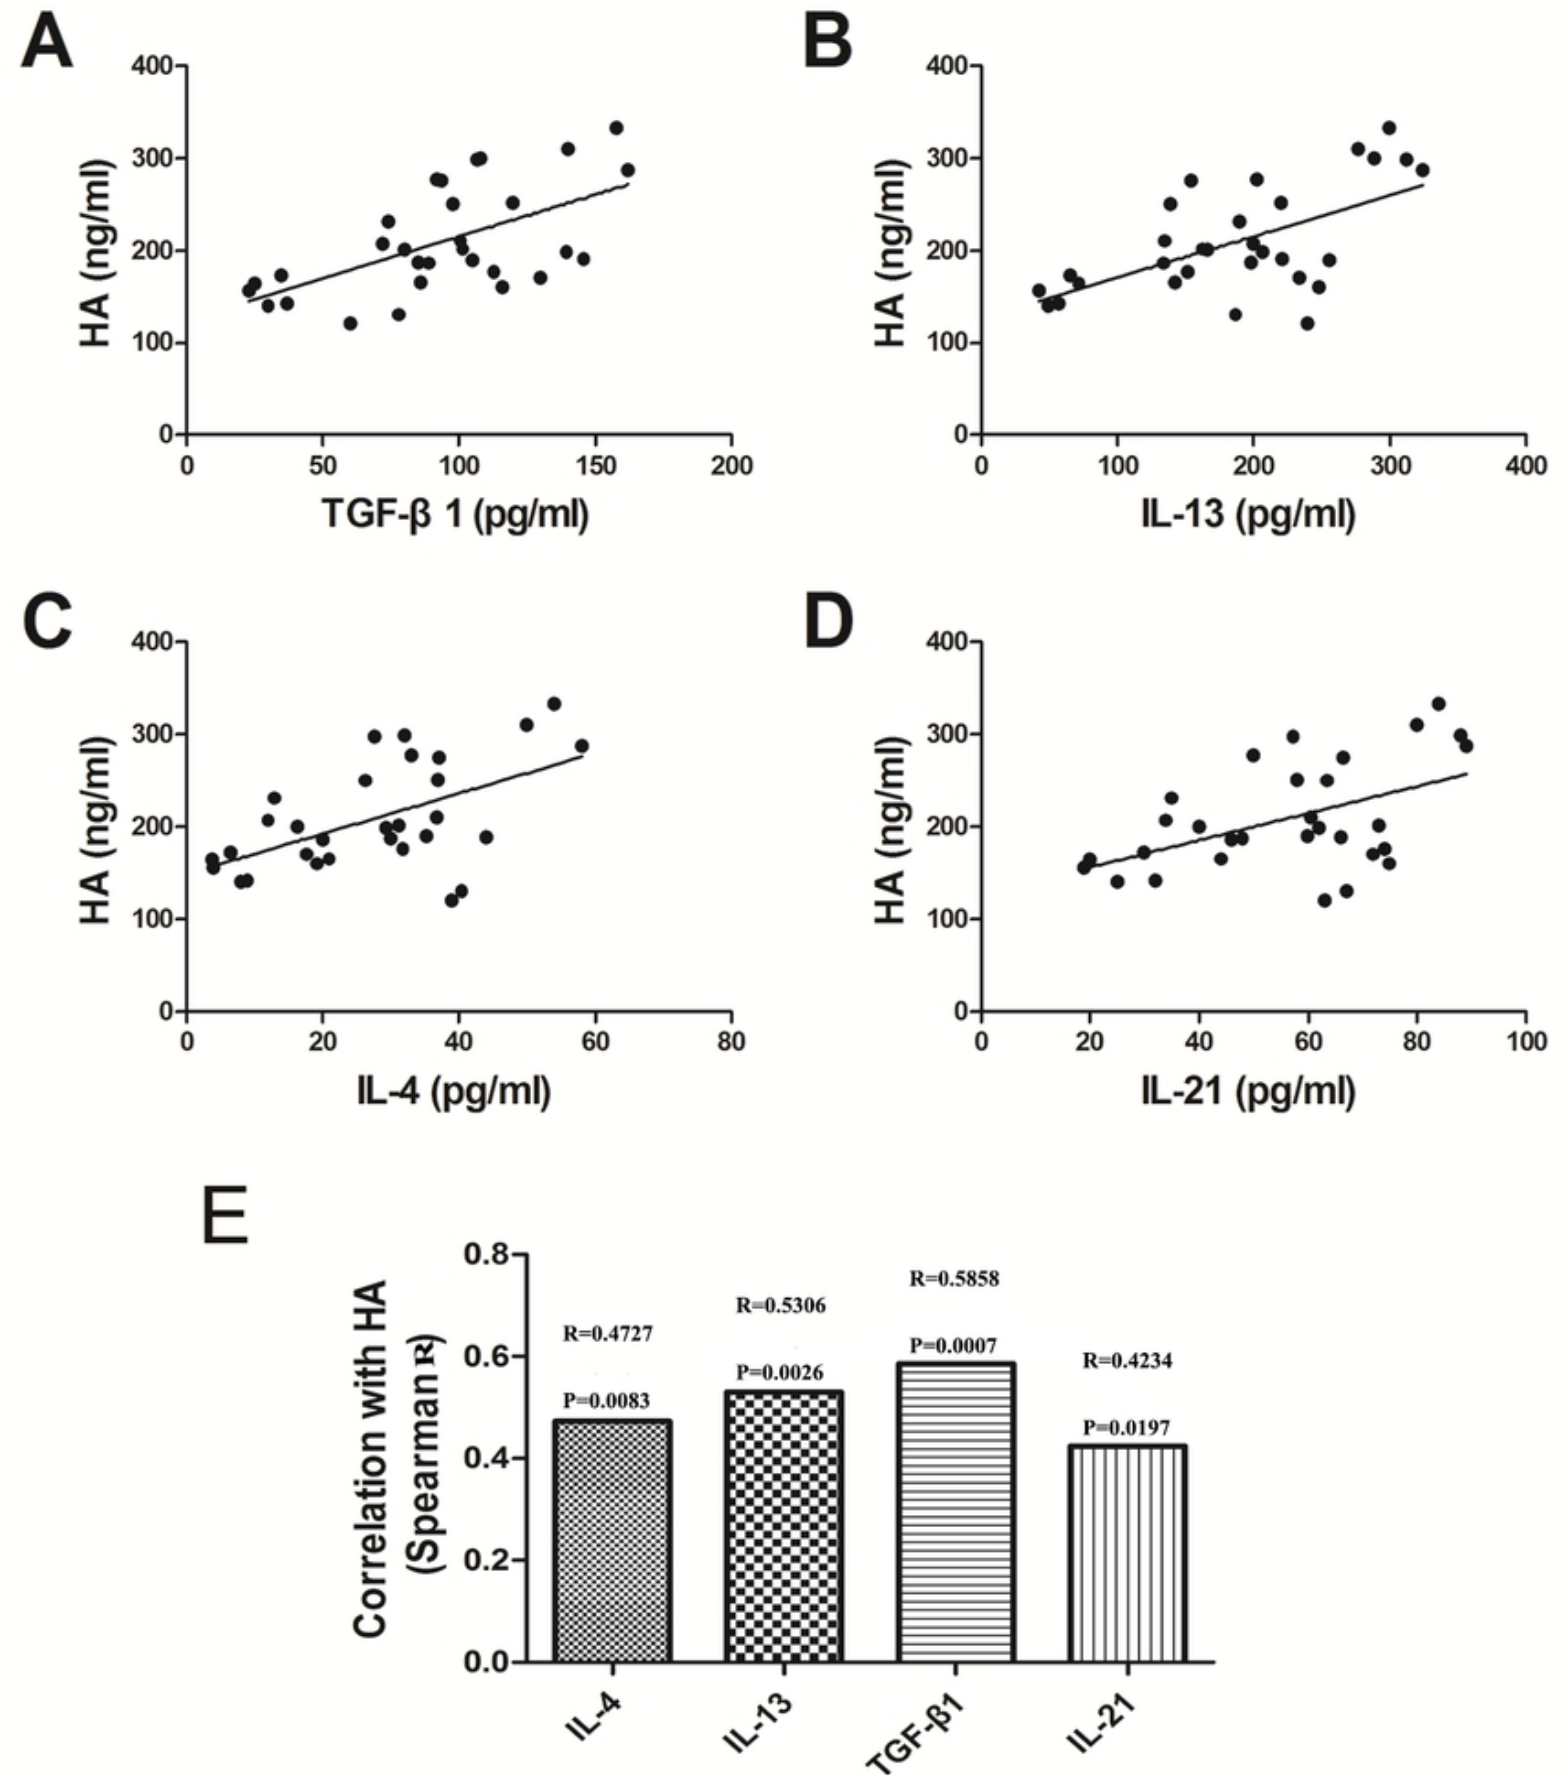

Figure

A

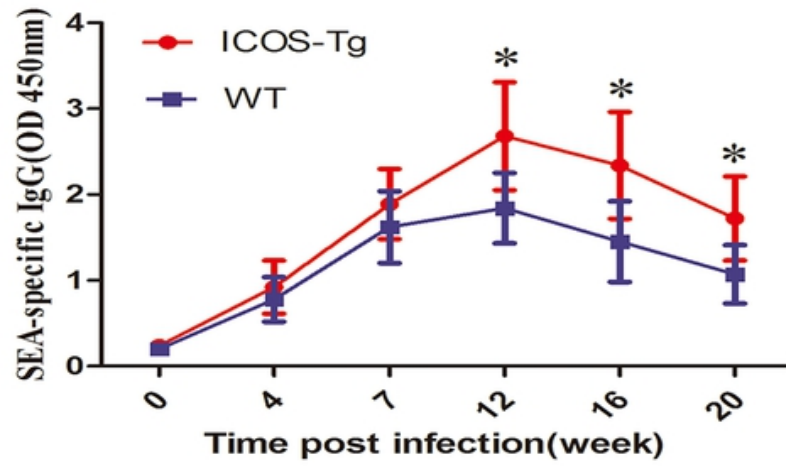

B

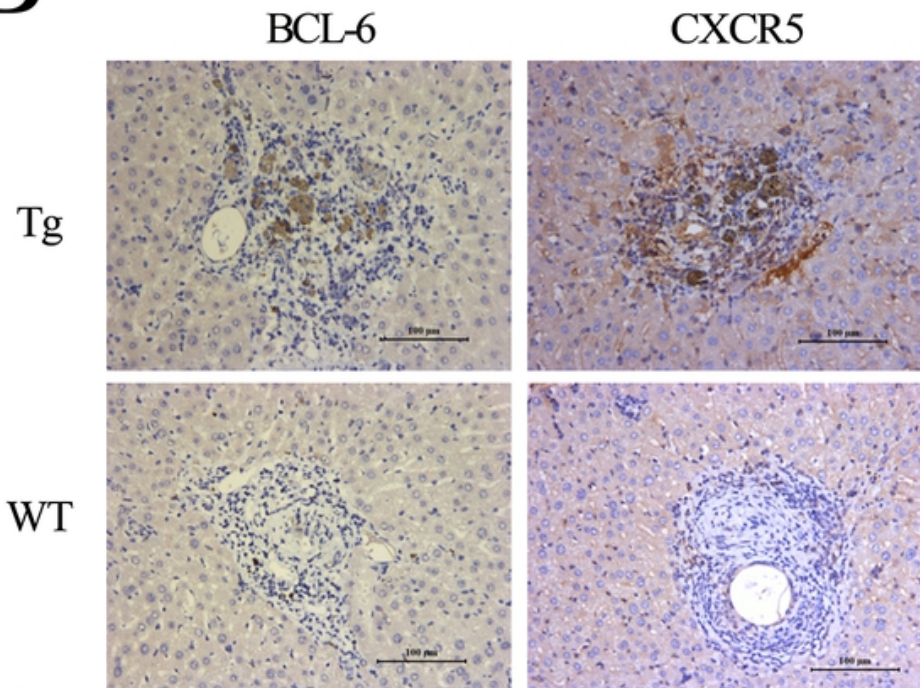

C

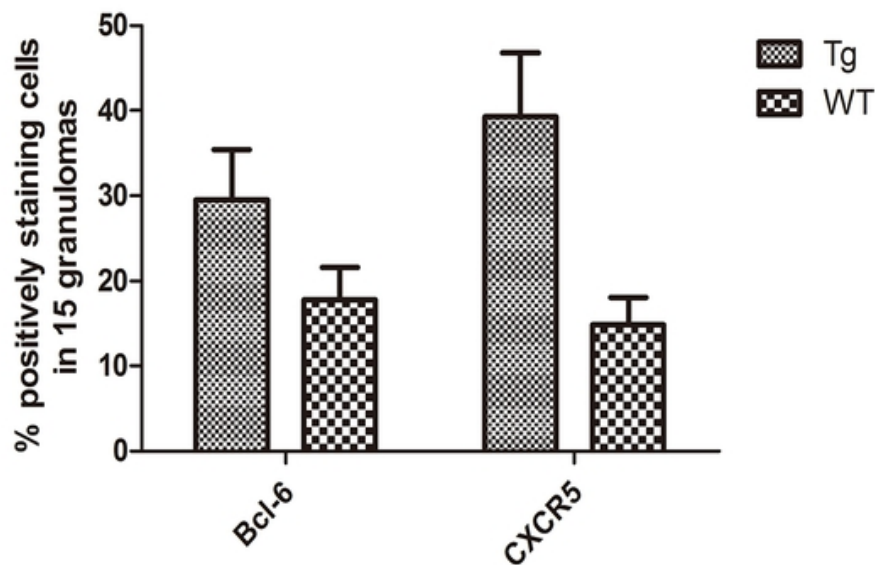

Figure
